# Supplementary material for: Identification and optimization of tunable endosomal escape parameters for enhanced efficacy in peptide-targeted prodrug-loaded nanoparticles
Source: Royal Society of Chemistry journal article supplement (doi:10.1039/d1nr05357d), 2022-01-01
Supplement: d1nr05357d1.pdf [file d1nr05357d1.pdf]

## Supplementary Material

# Identification and Optimization of Tunable Endosomal Escape Parameters for Enhanced Efficacy in Peptide-Targeted Prodrug-Loaded Nanoparticles

Franklin Mejia<sup>a</sup>, Sabrina Khan<sup>a</sup>, David T. Omstead<sup>a</sup>, Christina Minetos<sup>a</sup> & Basar Bilgicer<sup>a,b,c,d\*</sup>

<sup>a</sup> Department of Chemical and Biomolecular Engineering, University of Notre Dame, Notre Dame, IN 46556

<sup>b</sup> Department of Chemistry and Biochemistry, University of Notre Dame, Notre Dame, IN 46556

<sup>c</sup> Harper Cancer Research Institute, University of Notre Dame, Notre Dame, IN 46556

<sup>d</sup> Advanced Diagnostics and Therapeutics, University of Notre Dame, Notre Dame, IN 46556

\*Address correspondence to Prof. Basar Bilgicer, University of Notre Dame, 205C McCourtney Hall, Notre Dame, IN, 46556-5637. E-mail: [bbilgicer@nd.edu](mailto:bbilgicer@nd.edu).

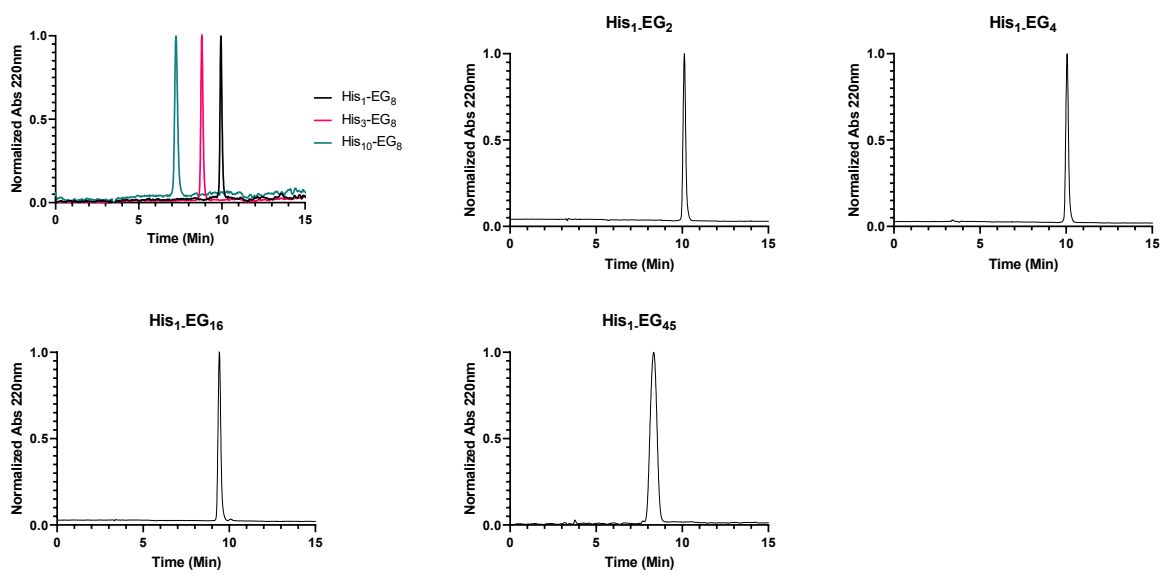

**Supplementary Figure S1.** Purity of His<sub>n</sub>-EG<sub>m</sub> conjugates was confirmed by RP-HPLC (>90%) using a Zorbax C3 semiprep column and a 2-propanol/acetonitrile/water gradient.

**Supplementary Table S1.** QTOF Mass Spectrometry Analysis of His<sub>n</sub>-EG<sub>m</sub> lipid conjugates confirms identity of His<sub>n</sub>-EG<sub>m</sub> conjugates.

| Molecule                           | Expected Mass (Da) | Observed Mass (Da) |
|------------------------------------|--------------------|--------------------|
| His <sub>1</sub> -EG <sub>2</sub>  | 1103.8             | 1103.8             |
| His <sub>1</sub> -EG <sub>4</sub>  | 1191.9             | 1191.9             |
| His <sub>1</sub> -EG <sub>8</sub>  | 1368.0             | 1368.0             |
| His <sub>1</sub> -EG <sub>16</sub> | 1791.2             | 1792.2             |
| His <sub>1</sub> -EG <sub>45</sub> | 2982.9             | 2983.9             |
| His <sub>3</sub> -EG <sub>8</sub>  | 1642.1             | 1643.1             |
| His <sub>10</sub> -EG <sub>8</sub> | 2601.5             | 2602.5             |

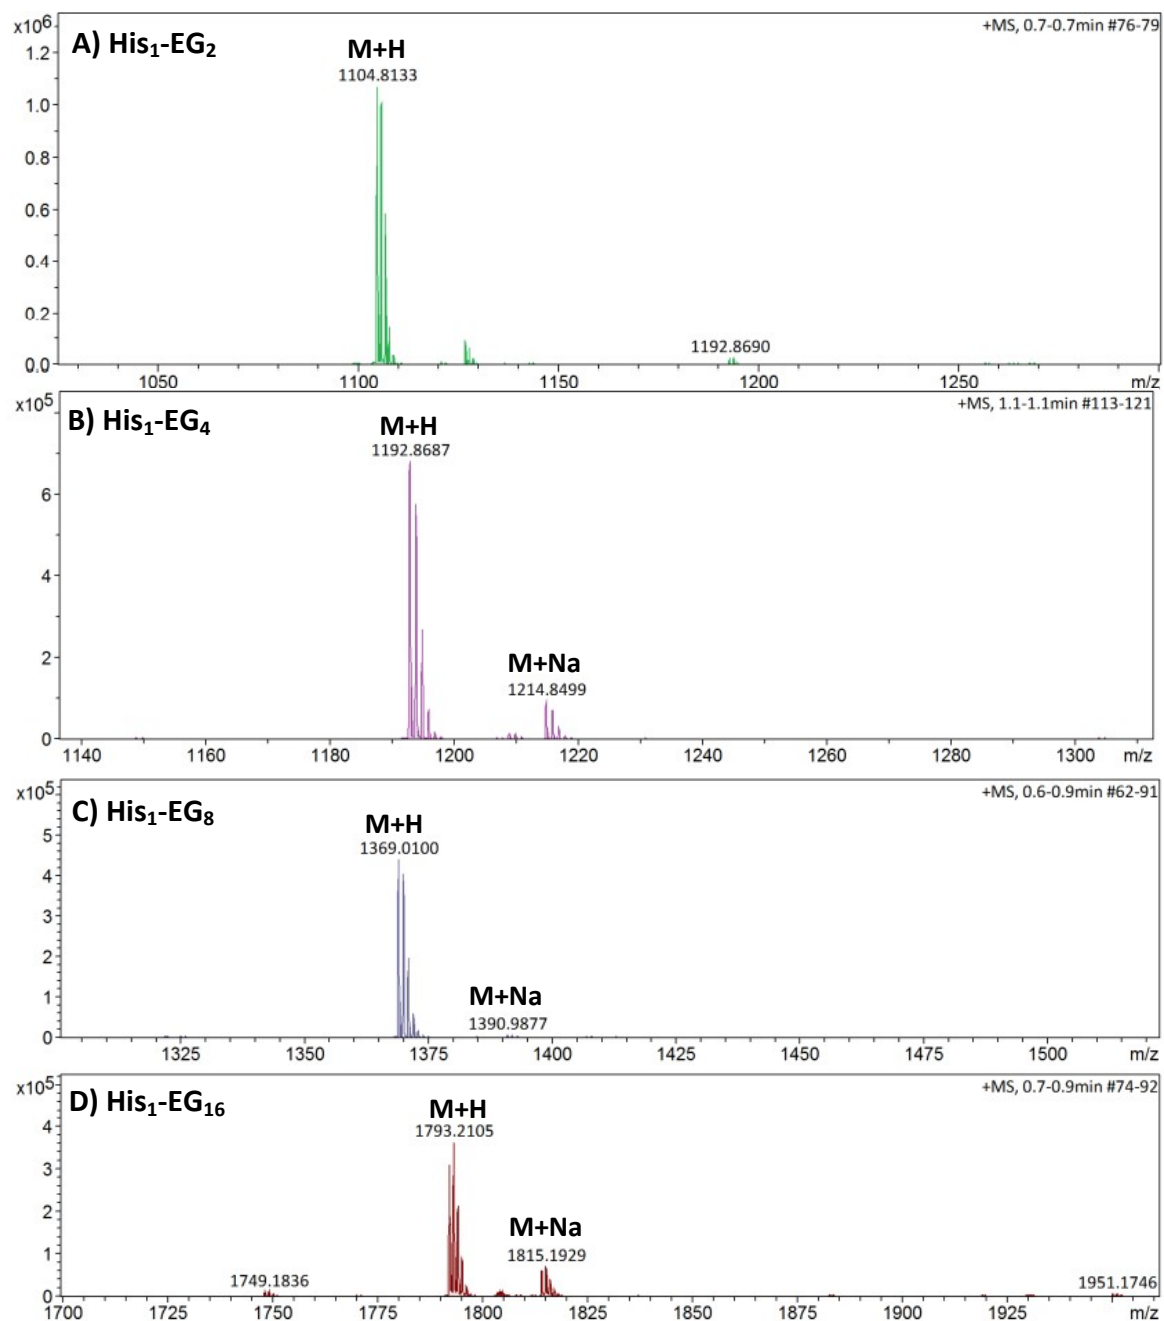

**Supplementary Figure S2 (Continued on page S4).** Mass Spectra of His<sub>n</sub>-EG<sub>m</sub> conjugates was obtained by QTOF MS. A) His<sub>1</sub>-EG<sub>2</sub>, B) His<sub>1</sub>-EG<sub>4</sub>, C) His<sub>1</sub>-EG<sub>8</sub>, D) His<sub>1</sub>-EG<sub>16</sub>, E) His<sub>1</sub>-EG<sub>45</sub>, F) His<sub>3</sub>-EG<sub>8</sub>, G) His<sub>10</sub>-EG<sub>8</sub>.

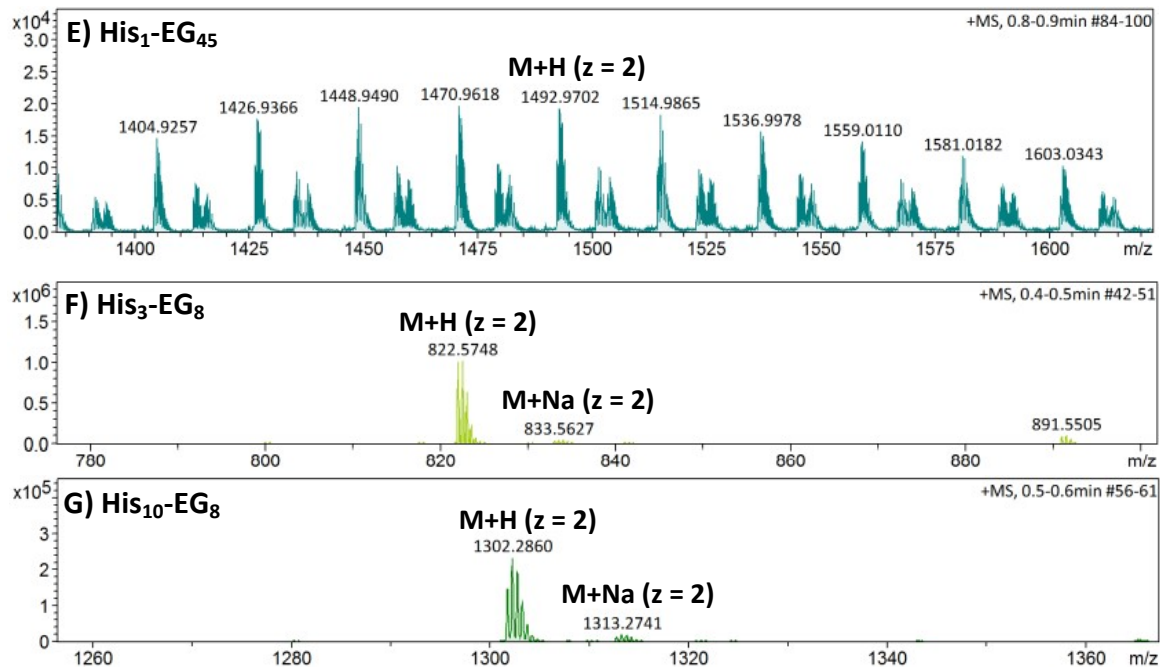

**Supplementary Figure S2 (Continued).** Mass Spectra of His<sub>n</sub>-EG<sub>m</sub> conjugates was obtained by QTOF MS. A) His<sub>1</sub>-EG<sub>2</sub>, B) His<sub>1</sub>-EG<sub>4</sub>, C) His<sub>1</sub>-EG<sub>8</sub>, D) His<sub>1</sub>-EG<sub>16</sub>, E) His<sub>1</sub>-EG<sub>45</sub>, F) His<sub>3</sub>-EG<sub>8</sub>, G) His<sub>10</sub>-EG<sub>8</sub>.

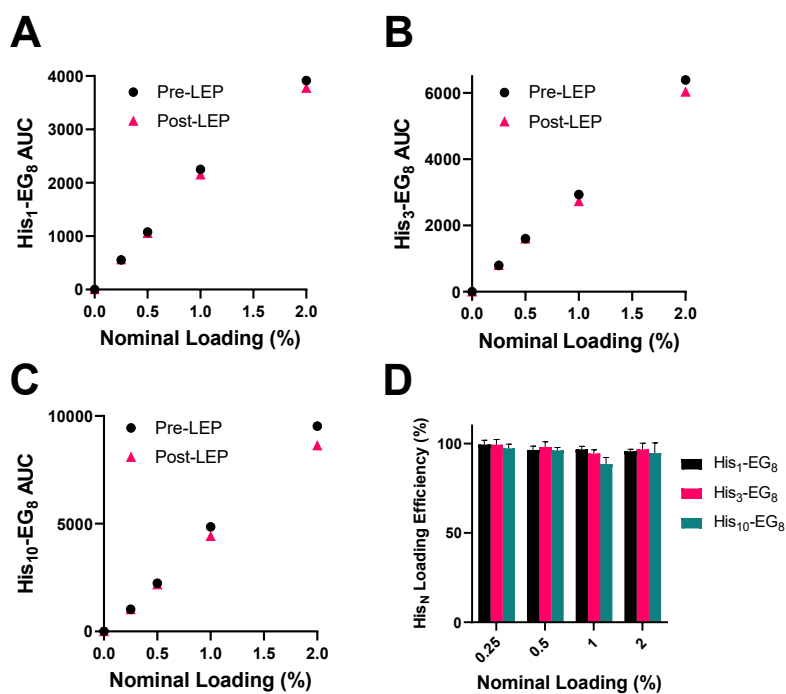

**Supplementary Figure S3.** Loading efficiency of His<sub>n</sub>-EG<sub>8</sub> onto NP was analyzed using a Zorbax C3 semiprep column and a 2-propanol/acetonitrile/water gradient.

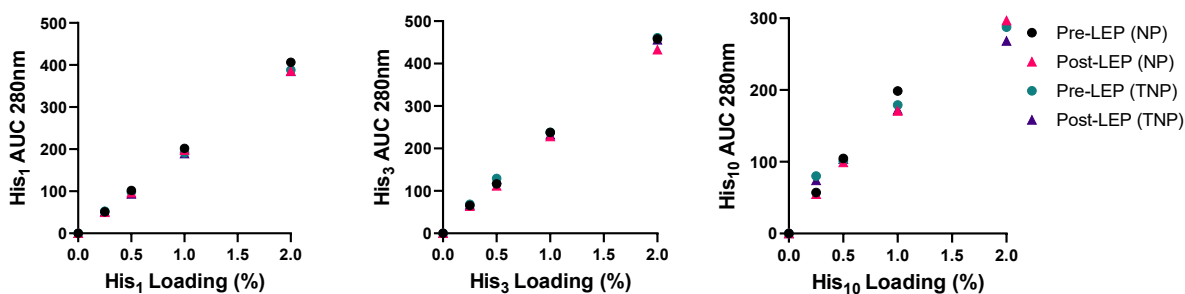

**Supplementary Figure S4.** Loading efficiency of His<sub>n</sub>-EG<sub>8</sub> onto TNP was His<sub>n</sub> content in NP and TNP was compared and confirmed to be equivalent.

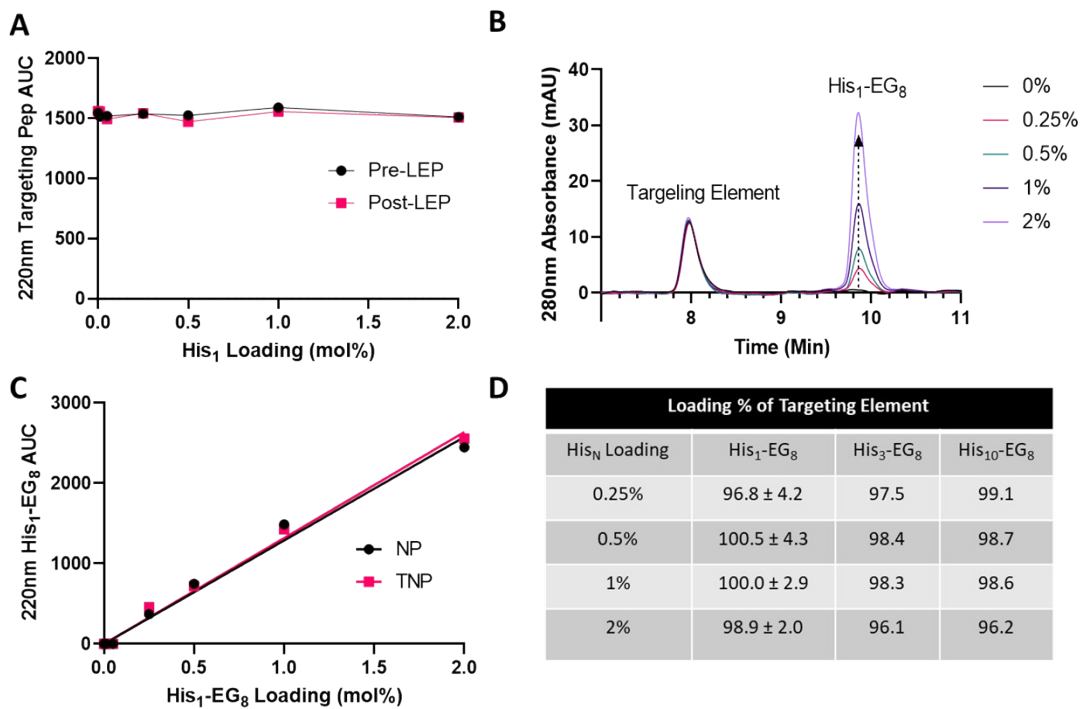

**Supplementary Figure S5.** The effect of His<sub>n</sub>-EG<sub>8</sub> on the loading of targeting elements was evaluated up to 2% mol of His<sub>n</sub>-EG<sub>8</sub> at a constant 1% mol of targeting peptide-lipid conjugate and analyzed using a Zorbax C3 semiprep column and a 2-propanol/acetonitrile/water gradient.

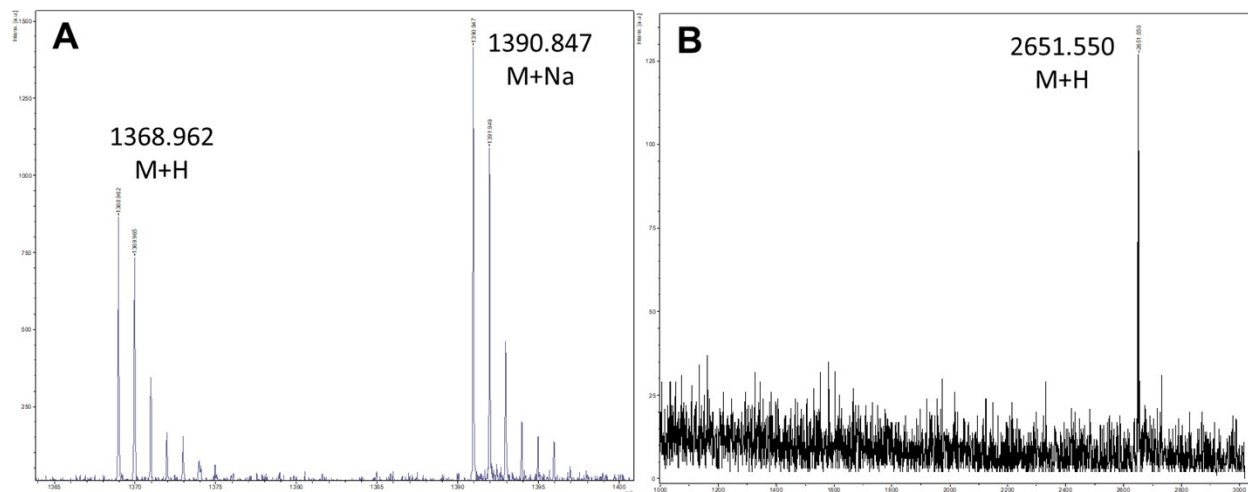

**Supplementary Figure S6.** His<sub>1</sub>-EG<sub>8</sub> LPAM1pep TNP were synthesized, purified by liposomal extruder purification (LEP) to remove unincorporated compounds and analyzed by RP-HPLC. His<sub>1</sub>-EG<sub>8</sub> and LPAM1pep fractions were collected and analyzed by MALDI MS to confirm preservation of the compounds throughout the nanoparticle synthesis process. His<sub>1</sub>-EG<sub>8</sub> expected: 1368.0, found: 1368.962 (M+H), 1390.847 (M+Na). LPAM1pep expected: 2650.6, found: 2561.55 (M+H).

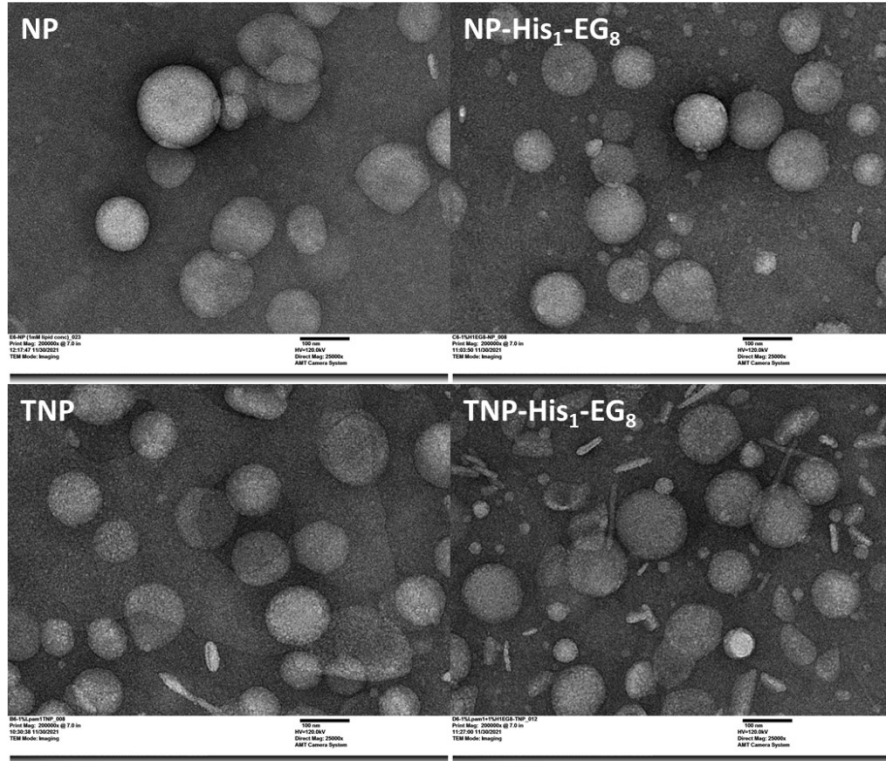

**Supplementary Figure S7.** Transmission Electron Microscopy images of NP and TNP with and without His<sub>1</sub>-EG<sub>8</sub> show nanoparticle morphology and polydispersity.

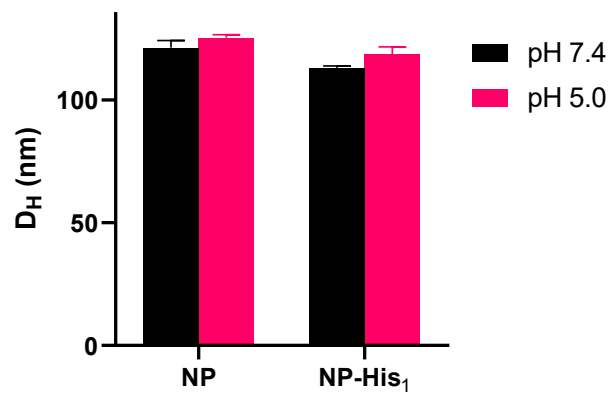

**Supplementary Figure S8.** Dynamic Light Scattering analysis shows NP and NP-His<sub>1</sub>-EG<sub>8</sub> have similar size, with minimal change upon change in pH.



**Supplementary Table S2.** Dynamic Light Scattering analysis of NP and TNP loaded with 0-2% His<sub>n</sub>-EG<sub>8</sub> and 0% (NP) or 1% (TNP) targeting peptide. Measurements performed at pH 7.4. Minimal size variation and low polydispersity is observed across all formulations.

|                                        | Non-Targeted Nanoparticles |           | Targeted Nanoparticles |           |
|----------------------------------------|----------------------------|-----------|------------------------|-----------|
|                                        | Eff. Diameter (nm)         | PD        | Eff. Diameter (nm)     | PD        |
| <b>0%</b>                              | 118.6±1.3                  | 0.07±0.04 | 117.0±3.2              | 0.11±0.06 |
| <b>His<sub>1</sub>-EG<sub>8</sub></b>  |                            |           |                        |           |
| <b>0.25%</b>                           | 119.7±1.5                  | 0.09±0.06 | 117.0±1.5              | 0.07±0.04 |
| <b>0.5%</b>                            | 118.6±3.1                  | 0.15±0.05 | 117.7±3.6              | 0.07±0.07 |
| <b>1%</b>                              | 118.7±1.6                  | 0.02±0.00 | 118.9±1.9              | 0.08±0.03 |
| <b>2%</b>                              | 117.9±3.2                  | 0.05±0.04 | 113.2±1.0              | 0.04±0.02 |
| <b>His<sub>3</sub>-EG<sub>8</sub></b>  |                            |           |                        |           |
| <b>0.25%</b>                           | 113.5±2.1                  | 0.08±0.04 | 119.2±2.0              | 0.07±0.03 |
| <b>0.5%</b>                            | 115.6±2.7                  | 0.08±0.09 | 121.6±1.9              | 0.07±0.03 |
| <b>1%</b>                              | 123.0±2.4                  | 0.05±0.06 | 117.0±0.8              | 0.06±0.03 |
| <b>2%</b>                              | 126.2±3.9                  | 0.06±0.06 | 133.1±3.2              | 0.11±0.03 |
| <b>His<sub>10</sub>-EG<sub>8</sub></b> |                            |           |                        |           |
| <b>0.25%</b>                           | 111.7±2.9                  | 0.06±0.04 | 116.6±2.3              | 0.09±0.05 |
| <b>0.5%</b>                            | 117.7±2.5                  | 0.03±0.02 | 115.6±2.5              | 0.06±0.03 |
| <b>1%</b>                              | 119.3±1.6                  | 0.06±0.03 | 120.2±3.6              | 0.10±0.04 |
| <b>2%</b>                              | 124.8±1.2                  | 0.06±0.04 | 120.6±1.7              | 0.11±0.05 |

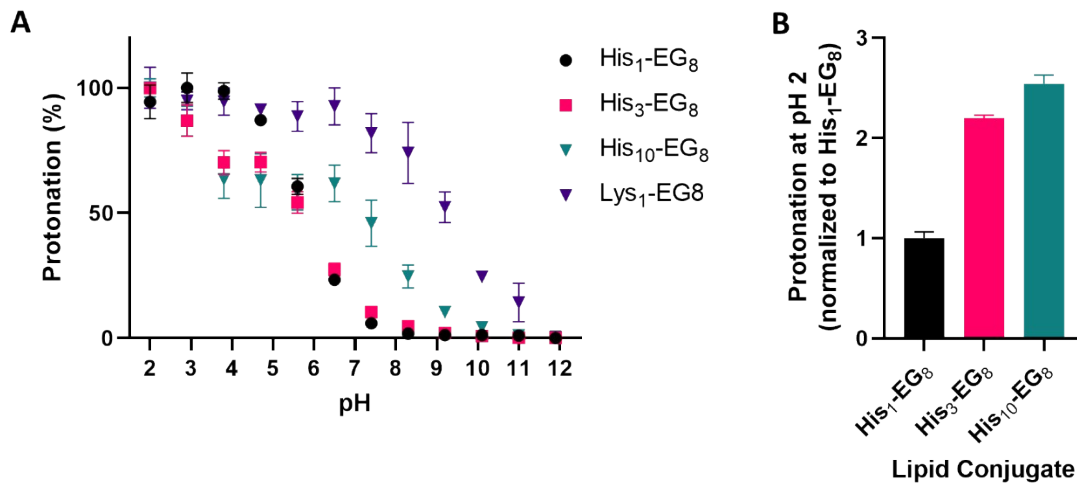

**Supplementary Figure S9.** (A) TNS Protonation assay for His<sub>n</sub>-EG<sub>8</sub> shows a pK<sub>a</sub> of ~5.8 for His<sub>1</sub>-EG<sub>8</sub>, ~5.7 for His<sub>3</sub>-EG<sub>8</sub> and at least two distinct pK<sub>a</sub>'s for His<sub>10</sub>-EG<sub>8</sub> (estimated at pH ~3 and ~7.4). Lys<sub>1</sub>-EG<sub>8</sub> lipid conjugate (pK<sub>a</sub> ~9.6) was evaluated side-by-side to confirm accuracy of the assay. (B) Total protonated groups of His<sub>n</sub>-EG<sub>8</sub> lipid conjugates normalized to His<sub>1</sub>-EG<sub>8</sub> show inefficient protonation of long oligohistidine chains such as His<sub>10</sub>-EG<sub>8</sub>. Bars and markers represent mean ±S.D. of triplicates.

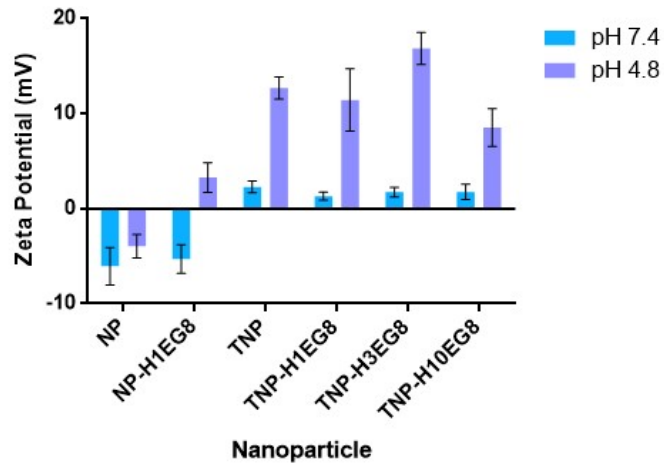

**Supplementary Figure S10.** Zeta potential analysis of NP and TNP with and without His<sub>n</sub>-EG<sub>8</sub> was performed at pH 7.4 and 4.8 as described in the materials and methods section. The targeting peptide for these experiments was 1% LPAM1pep. Bars represent mean ± S.D. of n>5 readings.

**Supplementary Table S3.** NP and TNP were loaded with 166, 500 or 1500 histidine residues per particle. Table shows equivalent %mol for each His<sub>n</sub>-EG<sub>8</sub> conjugate.

| His residues | His <sub>1</sub> (%mol loading) | His <sub>3</sub> (%mol loading) | His <sub>10</sub> (%mol loading) |
|--------------|---------------------------------|---------------------------------|----------------------------------|
| <b>166</b>   | 0.21%                           | 0.07%                           | 0.02%                            |
| <b>500</b>   | 0.64%                           | 0.21%                           | 0.06%                            |
| <b>1500</b>  | 1.87%                           | 0.64%                           | 0.19%                            |

**Supplementary Table S4:** Spatial distribution of lipid conjugates. Liposomal area and the total number of lipids per liposomal nanoparticle were first calculated assuming a spherical liposome. The spacing between each peptide-lipid conjugated is calculated from the ligand density assuming evenly spaced ligands in a square grid. \*The number of lipid conjugates considers only the outer leaflet of the liposome.

| Diameter (nm) | Lipid Conjugate (%mol loading) | Liposome Area (nm <sup>2</sup> ) | Lipids per Liposome | Total Lipid Conjugates* | Lipid Conjugate Density (nm <sup>2</sup> /conjugate) | Distance between conjugates (nm) |
|---------------|--------------------------------|----------------------------------|---------------------|-------------------------|------------------------------------------------------|----------------------------------|
| 100           | 0.25                           | 31,415.93                        | 80,092.5            | 100.1                   | 313.8                                                | 17.7                             |
| 100           | 0.5                            | 31,415.93                        | 80,092.5            | 200.2                   | 156.9                                                | 12.5                             |
| 100           | 1                              | 31,415.93                        | 80,092.5            | 400.5                   | 78.4                                                 | 8.8                              |
| 100           | 2                              | 31,415.93                        | 80,092.5            | 800.9                   | 39.2                                                 | 6.3                              |

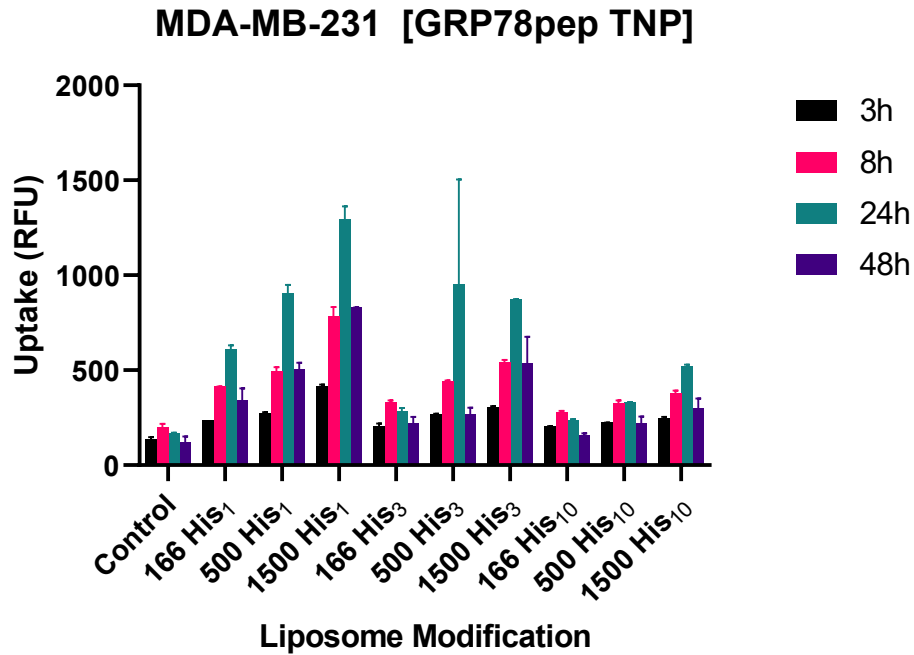

**Supplementary Figure S11.** Cellular uptake of GRP78pep TNP on metastatic triple negative breast cancer cell line MDA-MB-231. Internalization is depends on His<sub>n</sub> chain length, total number of His and incubation time.

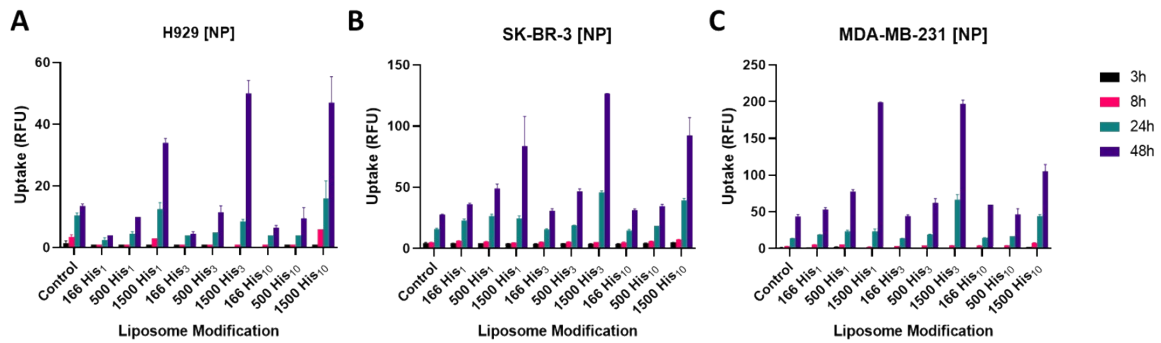

**Supplementary Figure S12.** Cellular uptake of non-targeted NP on H929 and MBA-MB-231 cell lines. At high concentrations of His<sub>n</sub> cellular internalization is triggered.

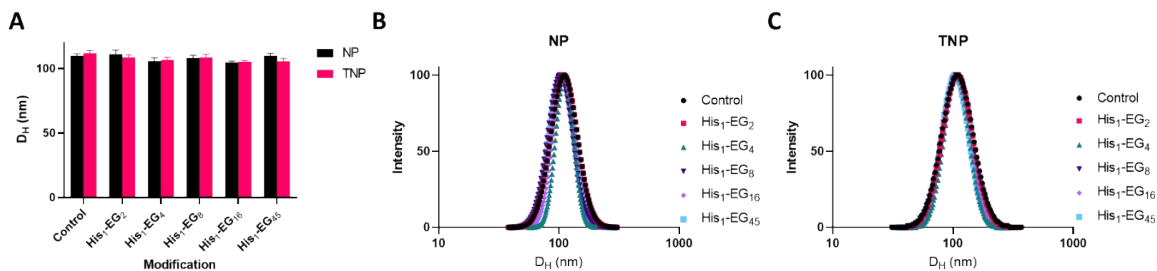

**Supplementary Figure S13.** Dynamic Light Scattering evaluation of NP and TNP loaded with His<sub>1</sub>-EG<sub>m</sub> lipid conjugates where m=2-45 show minimal differences in nanoparticle size.

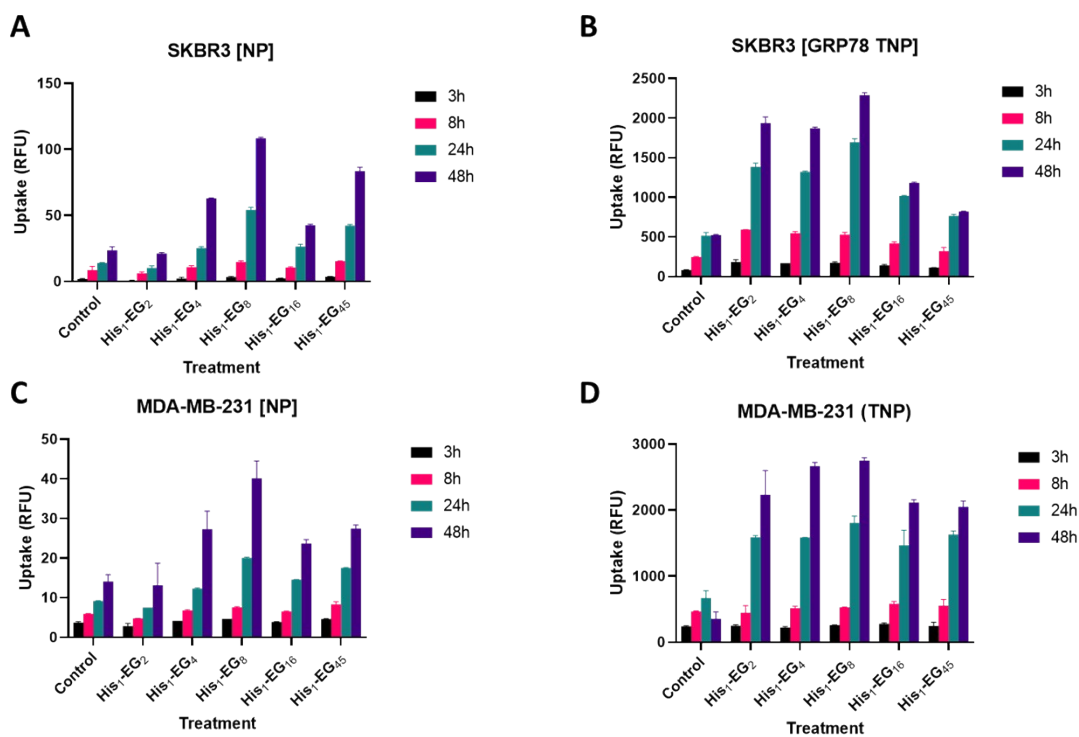

**Supplementary Figure S14.** Evaluation of His<sub>1</sub>-EG<sub>m</sub>-loaded NP and TNP on SKBR3 and MDA-MB-231 cell lines show different trends in NP and TNP. No trend was easily detectable for NP, while internalization of TNP benefited from shorter EG linkers.

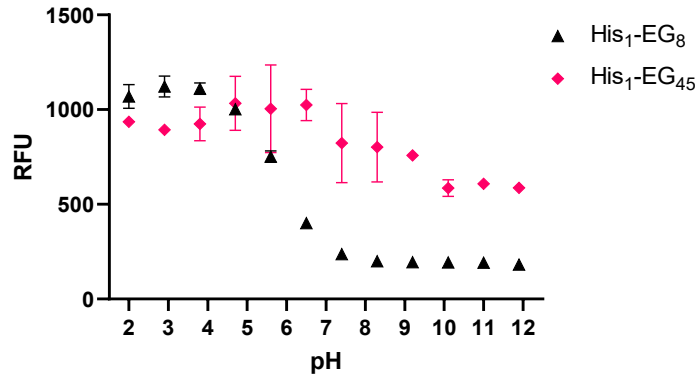

**Supplementary Figure S15.** TNS protonation assay of His<sub>1</sub>-EG<sub>8</sub> and His<sub>1</sub>-EG<sub>45</sub> shows abnormal protonation pattern of His<sub>1</sub>-EG<sub>45</sub>.

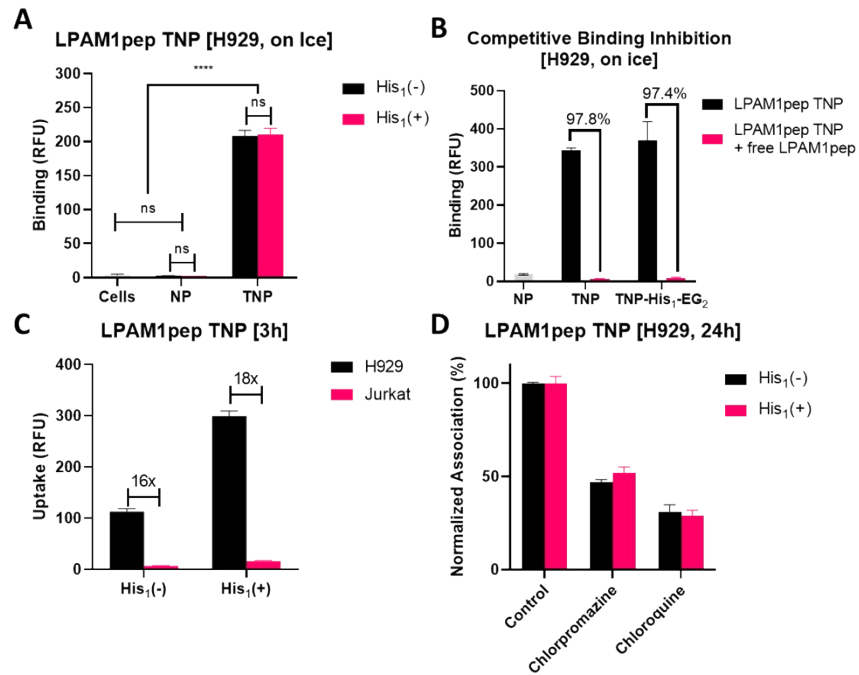

**Supplementary Figure S16.** (A) Addition of His<sub>1</sub>-EG<sub>2</sub> does not affect cell surface binding or NP or TNP. (B) Receptor-specificity of TNP binding was evaluated by competitive inhibition with free peptide. (C) Selectivity of the treatment was maintained when comparing internalization by H929 (LPAM1+) or Jurkat (LPAM1-) cell lines. (D) Effect of endocytosis inhibitors chlorpromazine and chloroquine on TNP cellular internalization.

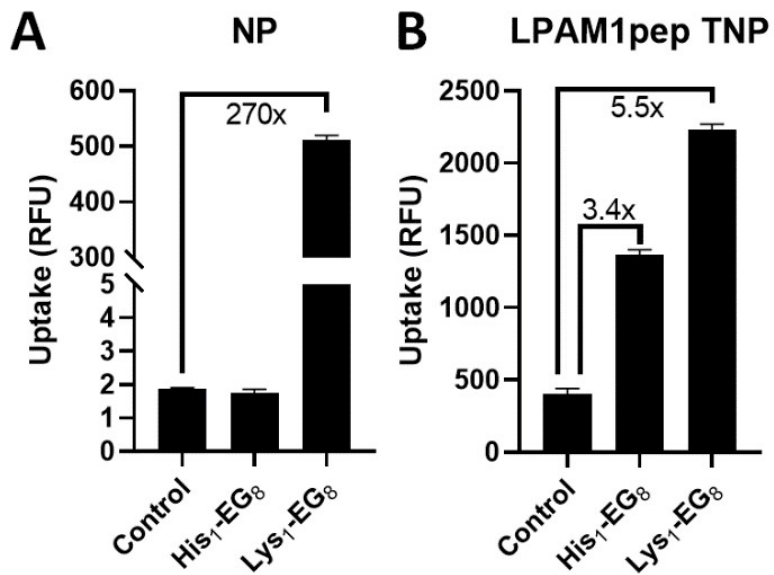

**Supplementary Figure S17.** Cellular internalization of NP (A) and LPAM1pep-TNP (B) containing His<sub>1</sub>-EG<sub>8</sub> or Lys<sub>1</sub>-EG<sub>8</sub> was evaluated on H929 cells. While both conjugates provide advantages in TNP internalization, His<sub>1</sub>-EG<sub>8</sub> does not produce non-specific cellular internalization of NP.

**Supplementary Table S5.** Name, targeted receptor, primary sequence and reference for all targeting peptides evaluated.

| Peptide  | Target                               | Sequence      | Reference               |
|----------|--------------------------------------|---------------|-------------------------|
| LPAM1pep | LPAM-1 ( $\alpha_4\beta_7$ integrin) | CRSDTLCGE     | Dubree et al, 2002[48]  |
| VLA4-pep | VLA-4 ( $\alpha_4\beta_1$ integrin)  | YCDPC         | Jackson et al, 1997[63] |
| CD138pep | CD138 (Syndecan-1)                   | RKRLQVQLSIRT  | Hayashi et al, 2002[65] |
| CD38pep  | CD38                                 | ARGDYYSNSLDYW | Omstead et al, 2020[64] |



|          |                                    |                     |                          |
|----------|------------------------------------|---------------------|--------------------------|
| HER2pep  | HER2/neu                           | YCDGFYACYMDV        | Berezov et al, 2001[66]  |
| LRP1pep  | LRP1                               | TFFYGGSRGKRNNFKTEEY | Demuele et al, 2007[67]  |
| GRP78pep | GRP78                              | SNTRVAP             | Mandelin et al, 2015[49] |
| iRGD     | $\alpha_v\beta_3, \alpha_v\beta_5$ | CRGDKGPDC           | Sugahara et al, 2009[68] |

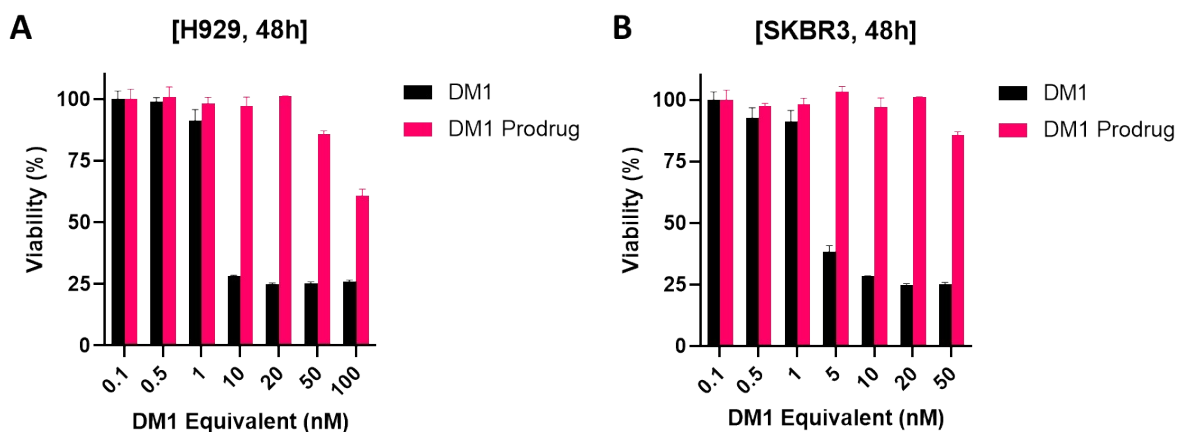

**Supplementary Figure S18.** Cytotoxicity of DM1 and DM1 prodrug on H929 and SKBR3 cell lines was evaluated. 48h after dosing, CCK8 solution was added to each treatment well for analysis of cell viability.

**Supplementary Table S6.** Loading efficiency of DM1 Prodrug in TNP and TNP-His<sub>1</sub>-EG<sub>2</sub>

|                                             | LPAM1pep Loading | His1-EG2 Loading | Prodrug Loading |
|---------------------------------------------|------------------|------------------|-----------------|
| TNP[DM1]                                    | 95.4%            | N/A              | 95.5%           |
| TNP-His <sub>1</sub> -EG <sub>2</sub> [DM1] | 97.1%            | 97.5%            | 95.6%           |

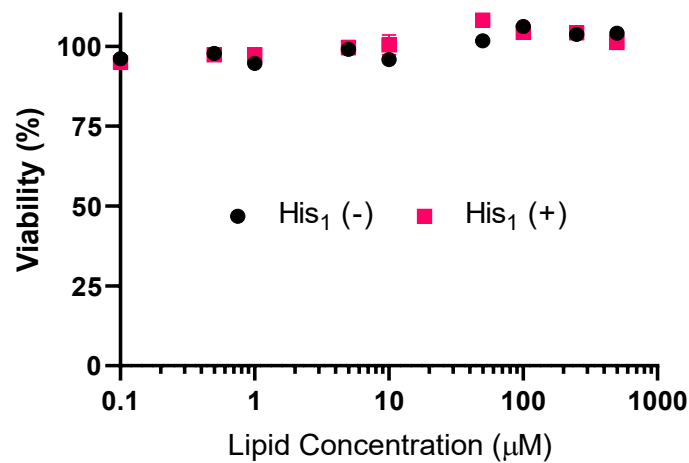

**Supplementary Figure S19.** Cytotoxicity assay of His<sub>1</sub>(-) and His<sub>1</sub>(+) nanoparticles on H929 cells shows these particles are not toxic in the absence of chemotherapeutic agents.

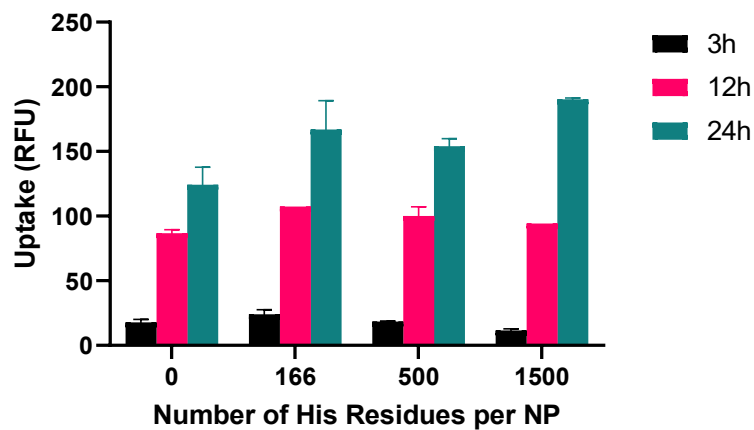

**Supplementary Figure S20.** Flow cytometry analysis of the interaction between His<sub>1</sub>-EG<sub>2</sub>-NP and bone marrow-derived macrophages (BMDM) shows minimal increase in cellular uptake.
